# Supplementary material
Source: PubMed Central journal article supplement (PMC6625914)

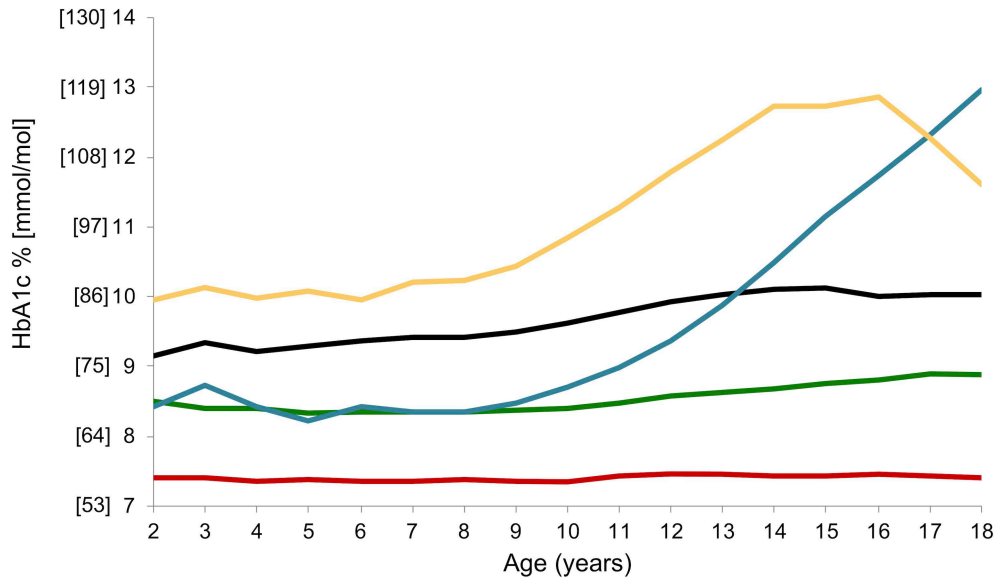

— Low Stable (31.3%)  
— High Stable (10.1%)  
— High Increasing (6.6%)

— Middle Stable (37.7%)  
— Middle Increasing (14.4%)

Supplement: NIHMS1027756-supplement-Supp_figS1.pdf [file NIHMS1027756-supplement-Supp_figS1.pdf]
